# Supplementary material for: Insights into emulsion synthesis of self-assembled suprastructures formed by Janus silica particles with –NH2/–SH surface groups
Source: Royal Society of Chemistry journal article supplement (doi:10.1039/d3na00909b), 2024-01-01
Supplement: d3na00909b1.pdf [file d3na00909b1.pdf]

SUPPORTING INFORMATION

# Insights into emulsion synthesis of self-assembled suprastructures formed by Janus silica particles with -NH<sub>2</sub>/-SH surface groups

Inna V. Melnyk<sup>\*a,b</sup>, Veronika Tomina<sup>a</sup>, Halyna Yankovych<sup>b</sup>, Hristo Kolev<sup>c</sup>, Erika Dutkova<sup>b</sup>, Troy C. Breijaert<sup>d</sup>, Vadim G. Kessler<sup>d</sup> and Gulaim A. Seisenbaeva<sup>\*d</sup>

<sup>a</sup>*Chuiko Institute of Surface Chemistry of NAS of Ukraine, 17, Generala Naumova str., Kyiv 03164 Ukraine*

<sup>b</sup>*Institute of Geotechnics, Slovak Academy of Sciences, Kosice, 45, Watsonova str., Kosice 04001, Slovak Republic*

<sup>c</sup>*Institute of Catalysis, Bulgarian Academy of Sciences, 11, Acad. G. Bonchev str., Sofia 1113, Bulgaria*

<sup>d</sup>*Department of Molecular Sciences, Swedish University of Agricultural Sciences, Box 7015, Almas allé 5, Uppsala 75007, Sweden*

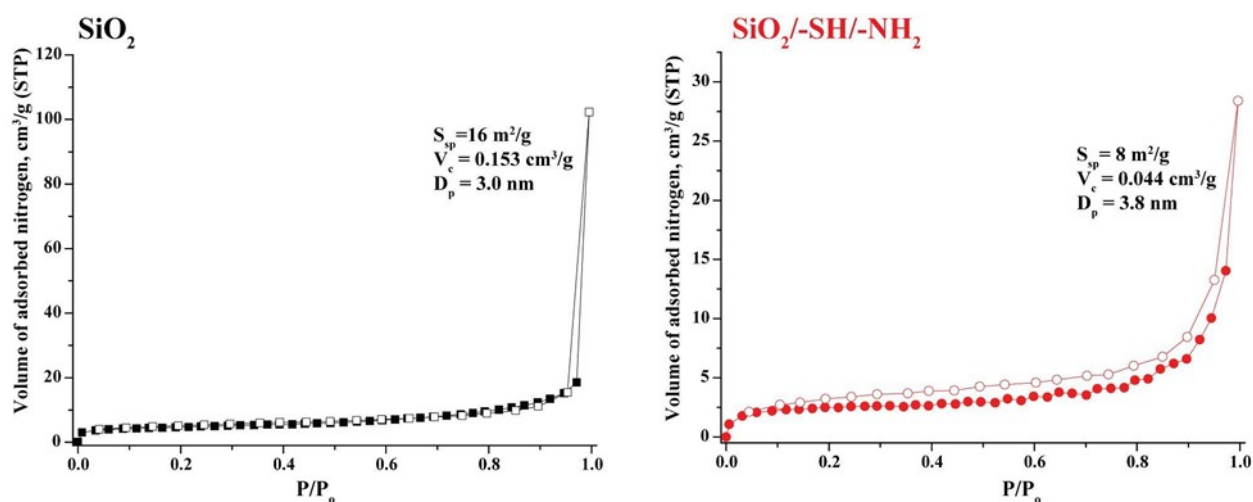

Figure S1. Low-temperature nitrogen adsorption-desorption isotherms.

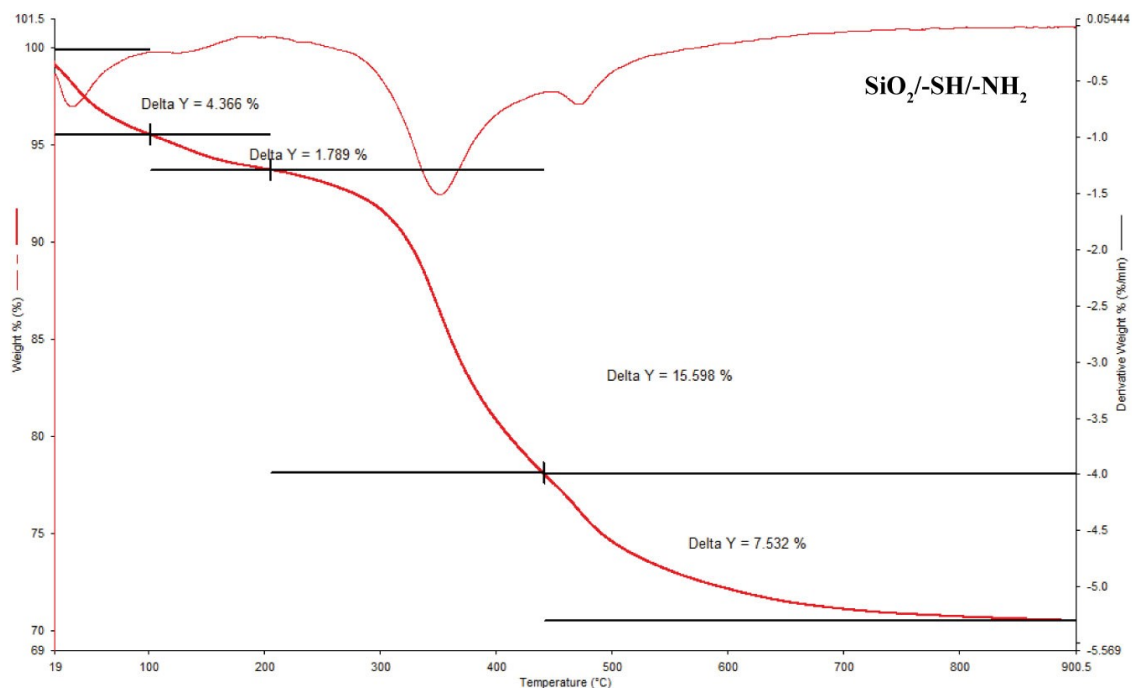

**Figure S2.** Thermogram of bifunctional silica particles  $\text{SiO}_2\text{-SH/-NH}_2$ .

**Table S1.** Adhesion energy for the surface-modified samples, bearing amino-, thiol, and dual amino & thiol surface functions.

|          | $\text{SiO}_2\text{-NH}_2$    | $\text{SiO}_2\text{-SH}$      | $\text{SiO}_2\text{-SH/-NH}_2$ |
|----------|-------------------------------|-------------------------------|--------------------------------|
| AE Fit 1 | $0.061 \pm 4,30\text{E-}4$ fJ | $0.440 \pm 0.003$ fJ          | $0.273 \pm 0.016$ fJ           |
| AE Fit 2 | $0.142 \pm 0,003$ fJ          | $0.683 \pm 6.25\text{E-}4$ fJ | $0.551 \pm 0.003$ fJ           |
| AE Fit 3 |                               | $0.551 \pm 0.002$ fJ          | $0.648 \pm 0.013$ fJ           |
| AE Fit 4 |                               | $0.811 \pm 0.015$ fJ          |                                |

**Table S2.**  $\text{SiO}_2\text{-SH/-NH}_2$ , surface atomic concentration, at. %.

|              | C 1s  |         | O 1s   | Si 2p                | S 2p                         | N 1s             |                   |
|--------------|-------|---------|--------|----------------------|------------------------------|------------------|-------------------|
| Conce, at. % | 30.89 |         | 34.89  | 25.06                | 6.03                         | 3.14             |                   |
| Conce, at. % | 27.8  | 3.09    | 34.89  | 25.06                | 6.03                         | 2.67             | 0.46              |
|              | C-C   | C-N/C-S | C-O-Si | Si-O, $\text{SiO}_2$ | Thiol, R-SH, $\text{S}^{2-}$ | $\text{-NH}_3^+$ | C-NH <sub>2</sub> |

**Table S3.**  $\text{SiO}_2\text{-SH/-NH}_2$  + fluorescein, surface atomic concentration, at. %.

|              | C 1s  |         | O 1s   | Si 2p | S 2p                 | N 1s                         |                  |                   |
|--------------|-------|---------|--------|-------|----------------------|------------------------------|------------------|-------------------|
| Conce, at. % | 33.57 |         | 35.58  | 23.30 | 4.83                 | 2.73                         |                  |                   |
| Conce, at. % | 25.18 | 8.39    | 33.87  | 1.71  | 23.30                | 4.83                         | 2.32             |                   |
|              | C-C   | C-N/C-S | C-O-Si | HO-Si | Si-O, $\text{SiO}_2$ | Thiol, R-SH, $\text{S}^{2-}$ | $\text{-NH}_3^+$ | C-NH <sub>2</sub> |

**Table S4.**  $\text{SiO}_2\text{-SH/-NH}_2\text{+Ag(I)}$ , surface atomic concentration, at. %.

|              | C 1s  |         | O 1s   | Si 2p | S 2p                 |                              | N 1s           |                 |                  | Ag3d              |      |
|--------------|-------|---------|--------|-------|----------------------|------------------------------|----------------|-----------------|------------------|-------------------|------|
| Conce, at. % | 32.23 |         | 36.60  | 21.13 | 4.54                 |                              | 2.66           |                 |                  | 2.83              |      |
| Conce, at. % | 28.36 | 3.87    | 32.45  | 4.15  | 21.13                | 2.31                         | 2.23           | 0.51            | 1.89             | 0.26              | 2.83 |
|              | C-C   | C-N/C-S | C-O-Si | HO-Si | Si-O, $\text{SiO}_2$ | Thiol, R-SH, $\text{S}^{2-}$ | $\text{-SO}_x$ | $\text{NO}_3^-$ | $\text{-NH}_3^+$ | C-NH <sub>2</sub> |      |

Table S5. SiO<sub>2</sub>/-SH/-NH<sub>2</sub>+fluorescein +Ag(I), surface atomic concentration, at. %.

|                 | C 1s  |                 |           | O 1s       |           | Si 2p                     | S 2p                               |                  | N 1s                         |                               |                   | Ag3d |
|-----------------|-------|-----------------|-----------|------------|-----------|---------------------------|------------------------------------|------------------|------------------------------|-------------------------------|-------------------|------|
| Conce,<br>at. % | 33.52 |                 |           | 36.64      |           | 21.10                     | 4.23                               |                  | 2.66                         |                               |                   | 1.85 |
| Conce,<br>at. % | 27.95 | 4.04            | 1.54      | 33.58      | 3.06      | 21.10                     | 3.33                               | 0.90             | 0.94                         | 1.07                          | 0.65              | 1.85 |
|                 | C-C   | C-<br>N/C-<br>S | C-S-<br>O | C-O-<br>Si | HO-<br>Si | Si-O,<br>SiO <sub>2</sub> | Thiol,<br>R-SH,<br>S <sup>2-</sup> | -SO <sub>x</sub> | NO <sub>3</sub> <sup>-</sup> | -NH <sub>3</sub> <sup>+</sup> | C-NH <sub>2</sub> |      |

Table S6. SiO<sub>2</sub>/-SH/-NH<sub>2</sub>+Au(III), surface atomic concentration, at. %.

|                 | C 1s  |         |       | O 1s       |       | Si 2p                     | S 2p                               |                  | N 1s                          |                   | Au4f             |
|-----------------|-------|---------|-------|------------|-------|---------------------------|------------------------------------|------------------|-------------------------------|-------------------|------------------|
| Conce,<br>at. % | 30.99 |         |       | 38.25      |       | 22.34                     | 4.53                               |                  | 2.48                          |                   | 1.41             |
| Conce,<br>at. % | 26.16 | 3.68    | 1.15  | 35.70      | 2.55  | 22.34                     | 1.95                               | 2.58             | 0.63                          | 1.85              | 1.41             |
|                 | C-C   | C-N/C-S | C-S-O | C-O-<br>Si | HO-Si | Si-O,<br>SiO <sub>2</sub> | Thiol,<br>R-SH,<br>S <sup>2-</sup> | -SO <sub>x</sub> | -NH <sub>3</sub> <sup>+</sup> | C-NH <sub>2</sub> | Au-<br>H-S-<br>C |

Table S7. SiO<sub>2</sub>/-SH/-NH<sub>2</sub>+ Eu(III), surface atomic concentration, at. %.

|                 | C 1s  |                 |           | O 1s   |       | Si 2p                     | S 2p                            | N 1s                         |                               |                   | Eu3d             |
|-----------------|-------|-----------------|-----------|--------|-------|---------------------------|---------------------------------|------------------------------|-------------------------------|-------------------|------------------|
| Conce,<br>at. % | 38.83 |                 |           | 33.24  |       | 19.76                     | 4.90                            | 2.16                         |                               |                   | 1.11             |
| Conce,<br>at. % | 33.98 | 2.94            | 1.91      | 31.57  | 1.67  | 19.76                     | 4.90                            | 0.52                         | 0.98                          | 0.66              | 1.11             |
|                 | C-C   | C-<br>N/C-<br>S | C-S-<br>O | C-O-Si | HO-Si | Si-O,<br>SiO <sub>2</sub> | Thiol, R-SH,<br>S <sup>2-</sup> | NO <sub>3</sub> <sup>-</sup> | -NH <sub>3</sub> <sup>+</sup> | C-NH <sub>2</sub> | Eu <sup>3+</sup> |

Table S8. SiO<sub>2</sub>/-SH/-NH<sub>2</sub>+Eu(III)+Au(III), surface atomic concentration, at. %.

|                 | C 1s  |         |  | O 1s   |       | Si 2p                     | S 2p                             |                  | N 1s                          |                   | Eu3d             | Ag3d             |
|-----------------|-------|---------|--|--------|-------|---------------------------|----------------------------------|------------------|-------------------------------|-------------------|------------------|------------------|
| Conce,<br>at. % | 27.17 |         |  | 40.03  |       | 24.39                     | 5.22                             |                  | 2.14                          |                   | 0.08             | 0.98             |
| Conce,<br>at. % | 22.62 | 4.55    |  | 35.48  | 4.55  | 24.39                     | 1.85                             | 3.37             | 0.86                          | 1.28              | 0.08             | 0.98             |
|                 | C-C   | C-N/C-S |  | C-O-Si | HO-Si | Si-O,<br>SiO <sub>2</sub> | Thiol, R-<br>SH, S <sup>2-</sup> | -SO <sub>x</sub> | -NH <sub>3</sub> <sup>+</sup> | C-NH <sub>2</sub> | Eu <sup>3+</sup> | Au-<br>H-S-<br>C |

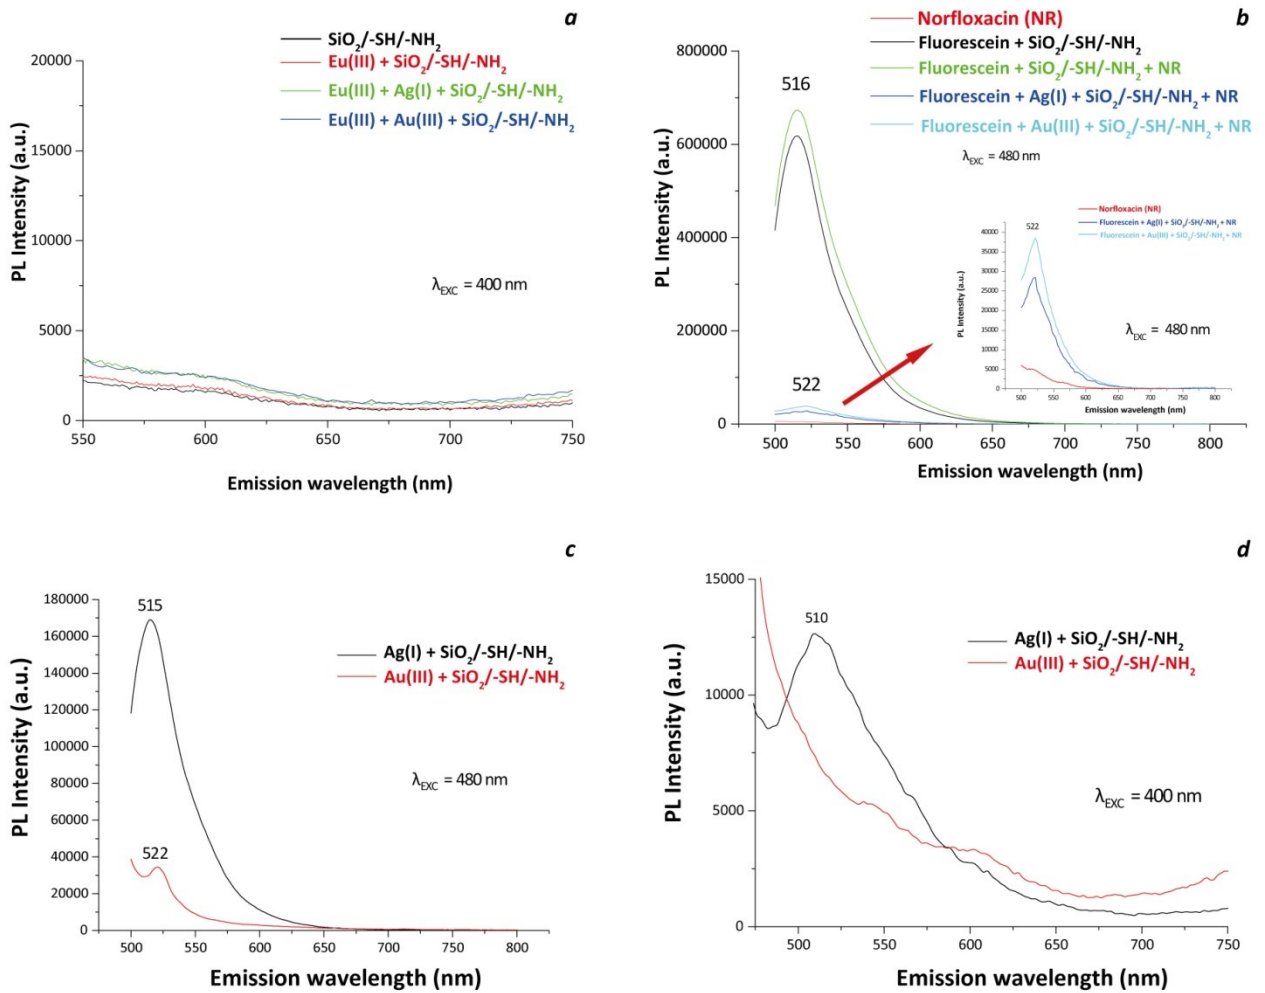

**Figure S3.** Photoluminescence spectra of suspensions of  $\text{SiO}_2\text{-SH/-NH}_2$  silica particles with different  $\lambda_{\text{exc}}$ : loaded with and without cations (a) ( $C_{\text{sample}} = 0.1 \text{ g}\cdot\text{L}^{-1}$ ), with fluorescein in the presence of the antibiotic norfloxacin (b) ( $C_{\text{sample}} = 0.05 \text{ g}\cdot\text{L}^{-1}$ ), silica particles with adsorbed gold or silver cations (c,d) ( $C_{\text{sample}} = 0.1 \text{ g}\cdot\text{L}^{-1}$ ).
